# Supplementary material for: Membrane Lipids in Ultra-High-Risk Patients: Potential Predictive Biomarkers of Conversion to Psychosis
Source: MDPI journal article supplement (doi:10.3390/nu15092215), 2023-05-07

Supplementary Figure S1 : Heatmap for fatty acids showing only group averages at inclusion regarding the status

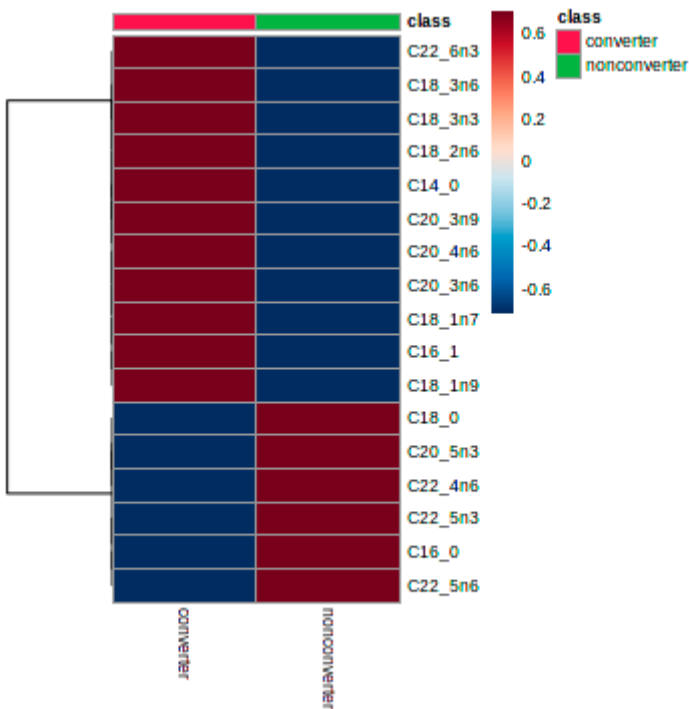

Supplementary Figure S2 : Heatmap for phospholipids showing only group averages at inclusion regarding the status

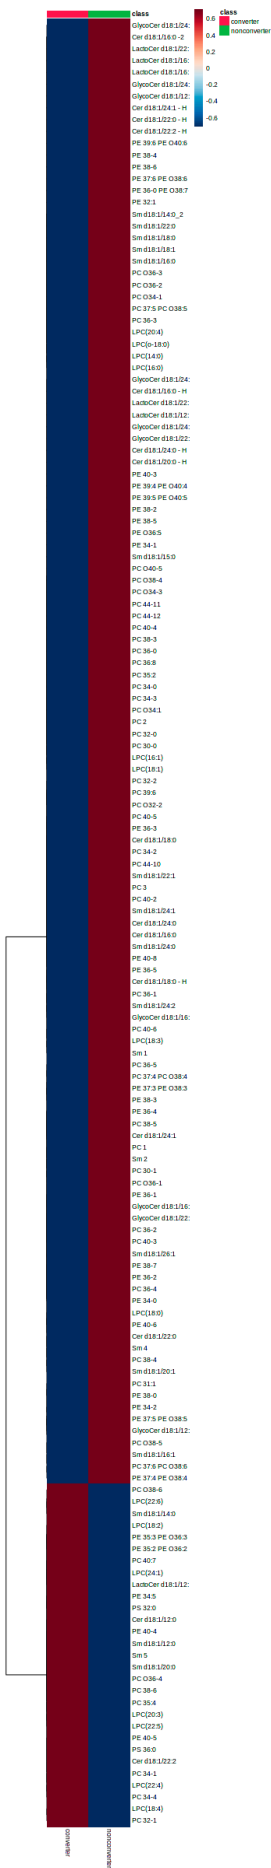

Supplementary Figure S3 : Heatmap for fatty acids showing only group averages at inclusion regarding the cluster of Linoleic acid (LA) level

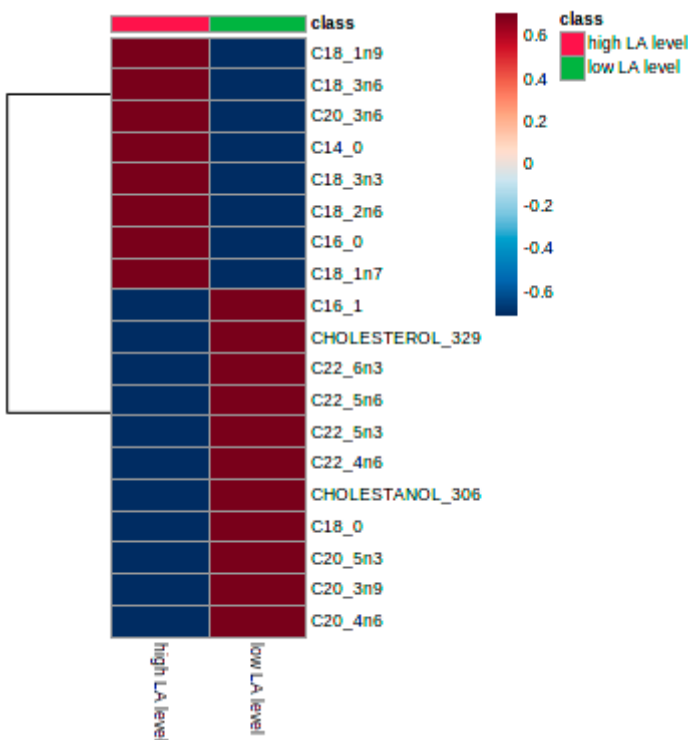

Supplementary Figure S4 : Heatmap for membrane lipids showing only group averages for all subjects regarding time. Class 0: inclusion. Class 1: final time

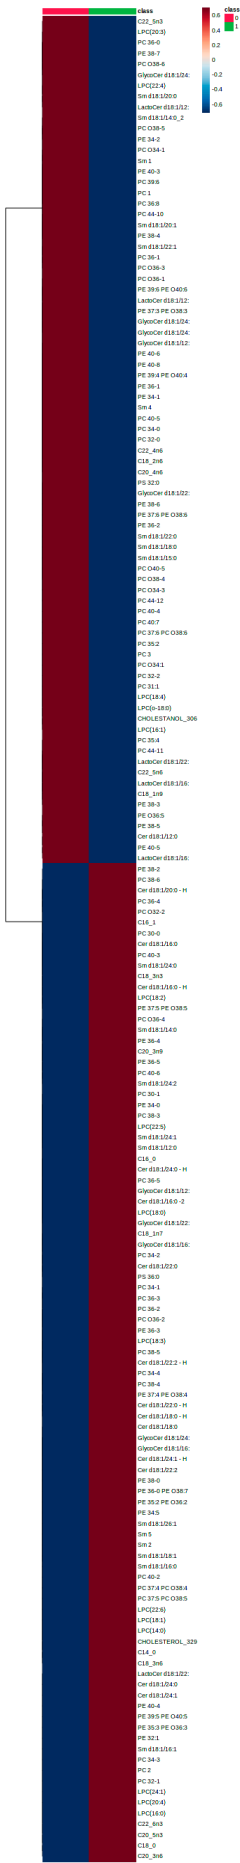

**Supplementary Figure S5 : Heatmap for membrane lipids showing only group averages for converters regarding time. Class 0: inclusion. Class 1: final time**

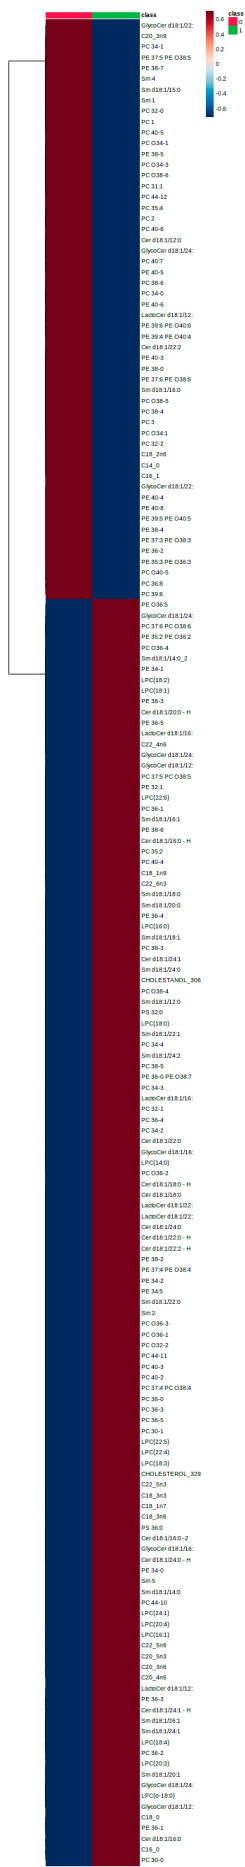

**Supplementary Figure S6 : Heatmap for membrane lipids showing only group averages for non converters regarding time. Class 0: inclusion. Class 1: final time**

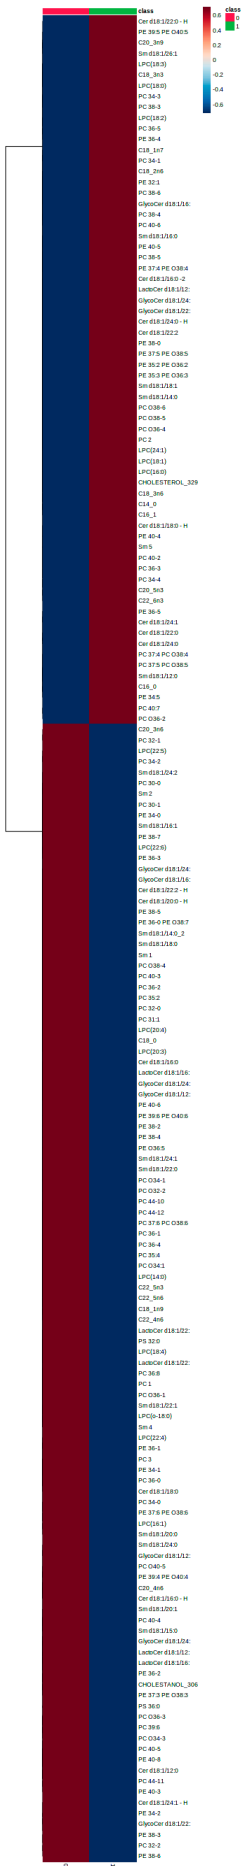

Supplement: s1 [file s1]
